# Supplementary material
Source: PubMed Central journal article supplement (PMC6429922)

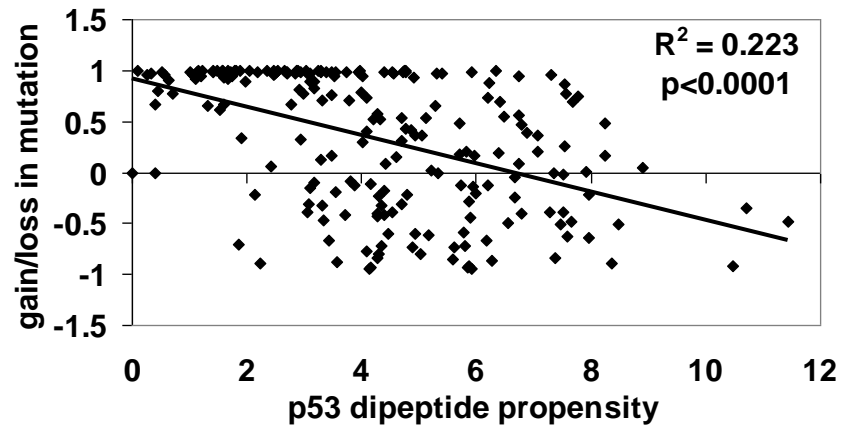

A

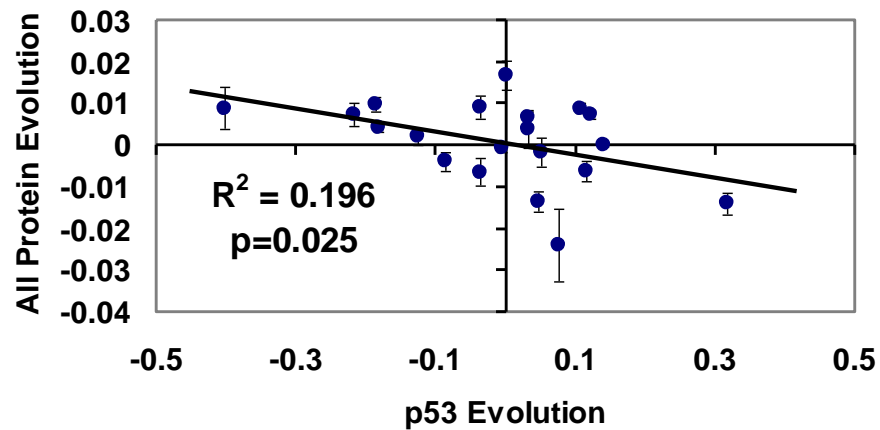

B

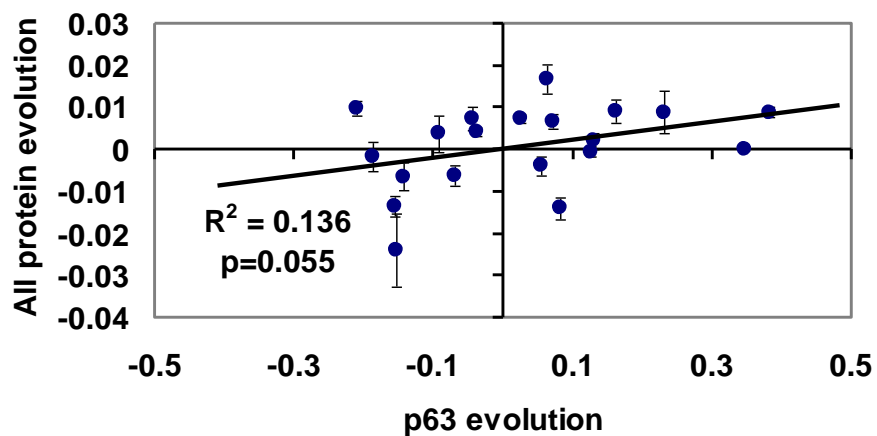

C

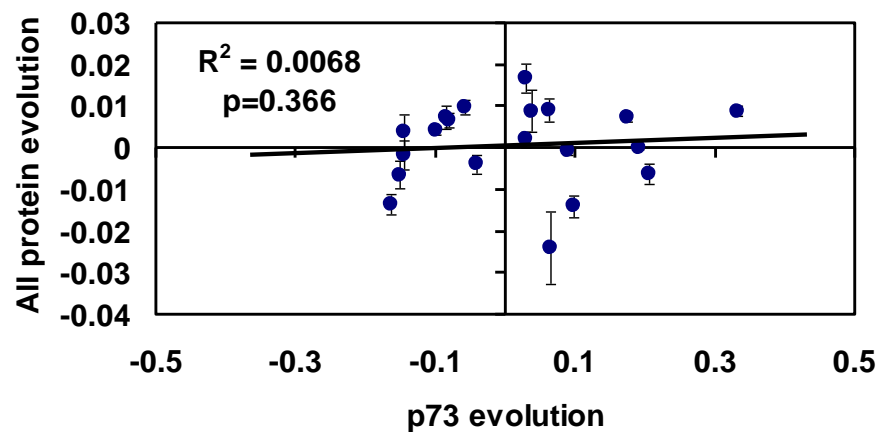

D

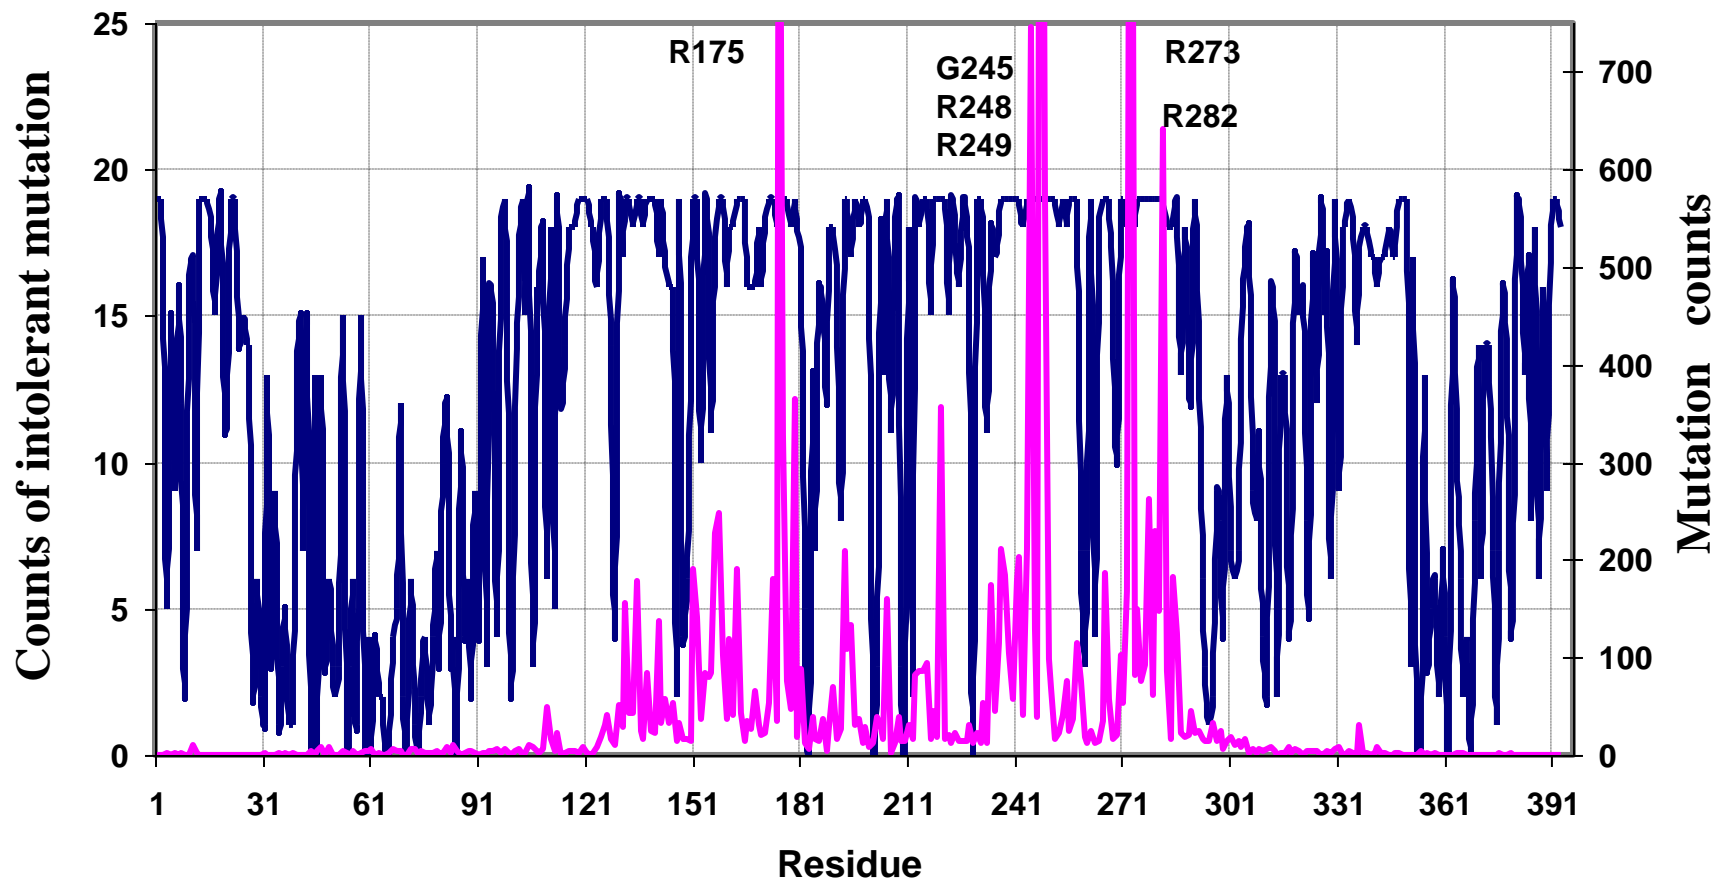

Sup-Figure 2

Supplement: NIHMS1007573-supplement-sup-figure.pdf [file NIHMS1007573-supplement-sup-figure.pdf]
